# Supplementary material for: Endowing rubber with intrinsic self-healing properties using thiourea-based polymer
Source: Royal Society of Chemistry journal article supplement (doi:10.1039/d4ra03808h), 2024-01-01
Supplement: d4ra03808h1.pdf [file d4ra03808h1.pdf]

# 1 Endow Rubber with Intrinsic Self-Healing Property Using Thiourea-Based 2 Polymer

3 Afreen Shagufta, <sup>a,b,c,d</sup> Lei Wang, <sup>a,c,d</sup> Senbiao Fang, <sup>a,c,d</sup> Qingshan Kong, <sup>\*a,c,d</sup> and Haibo  
4 Zhang <sup>\*a,c,d</sup>

5

6 <sup>a</sup>Qingdao Institute of Bioenergy and Bioprocess Technology, Chinese Academy of Sciences,  
7 Qingdao 266101, China.

8 <sup>b</sup>University of Chinese Academy of Sciences, Beijing 100049, China.

9 <sup>c</sup>Qingdao New Energy Shandong Laboratory, Qingdao 266101, China.

10 <sup>d</sup>Shandong Energy Institute, Qingdao 266101, China.

11

12 \*Corresponding authors: Haibo Zhang ([zhanghb@qibebt.ac.cn](mailto:zhanghb@qibebt.ac.cn)); Qingshan Kong  
13 ([kongqs@qibebt.ac.cn](mailto:kongqs@qibebt.ac.cn)).

14

15 **This Supplementary file includes:**

16 **Synthesis of PTUEG<sub>3</sub>**

17 **Figures S1, S2**

18 **Supporting table S1**

19

20 **Synthesis of Thermoplastic polymer**

21 Initially, PTUEG<sub>3</sub> was synthesized following the procedure described in previous literature  
22 with some modifications (Fig. S1).<sup>1</sup> Specifically, 1,2-bis(2-aminoethoxy)ethane (160 mg) and  
23 1,1'-thiocarbonyl diimidazole (175 mg) were dissolved in a 50 ml solution of DMF. The  
24 resulting mixture was stirred at 30 °C for 2 h, followed by additional stirring at 25 °C for 24  
25 h. Subsequently, 50 ml of chloroform was added to the solution, and the diluted mixture was  
26 poured into 1 L of diethyl ether for precipitation. The resulting precipitate was dissolved in  
27 50 ml of chloroform, and the mixture was then re-precipitated in 1 L of diethyl ether to obtain  
28 the purified product. The insoluble fraction was collected after centrifugation for 15 min at a  
29 speed of 5000 rpm, yielding PTUEG<sub>3</sub> in the form of a shimmery yellow gel. This precipitate  
30 was further dried in a vacuum oven at 140 °C for 12 h. The resulting yellow gel was then  
31 cooled in a Teflon mold and processed to form a solid, transparent substance in a vacuum

32 oven at ambient temperature, resulting in a dry, solid polymer.

33

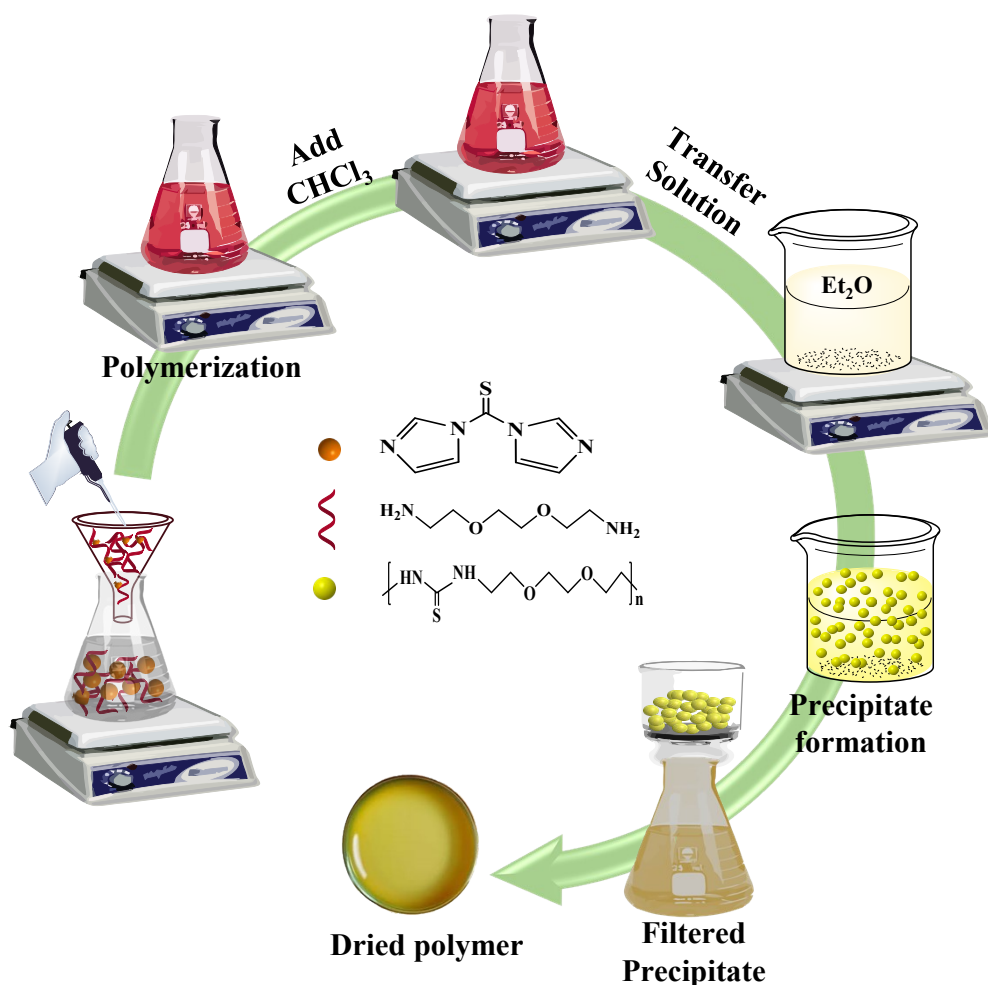

34

35

Fig. S1 Schematic representations of synthesis PTUEG<sub>3</sub>

36

### 37 NMR spectra

38 PTUEG<sub>3</sub> was produced as a thermoplastic polymer and was characterized using <sup>1</sup>H and <sup>13</sup>C  
39 nuclear magnetic resonance (NMR) spectroscopy. As shown in (Fig. S2a), <sup>1</sup>H NMR end-  
40 group analysis at 500 MHz (DMSO-d<sub>6</sub>) revealed multiple peak distributions of 2.89 (br,  
41 CH<sub>2</sub>NH<sub>2</sub>), 3.49–3.54 (br, CH<sub>2</sub>O, C(S) NHCH<sub>2</sub>), and 7.53 (br, C(S) NH). However, a slight  
42 shift of 0.05 ppm was observed, with the signal at 3.49 ppm shifting to a higher frequency at  
43 3.54 ppm, attributed to the action of sulfur bonds. In (Fig. S2b), <sup>13</sup>C NMR (125 MHz,  
44 DMSO-d<sub>6</sub>) showed peaks at 43.96, 69.48, 70.05 and 183.26 with a repeat delay of 10s. The  
45 high concentration of the samples resulted in standard signal/noise ratios. The chemical shifts  
46 (δ in ppm) were calculated using non-deuterated solvent residues. The average number of  
47 repeating units was determined to be 50 based on the intensity ratio between the signals at δ  
48 2.89 (2H br, CH<sub>2</sub>NH<sub>2</sub>) and 7.53 ppm (thiourea-H).

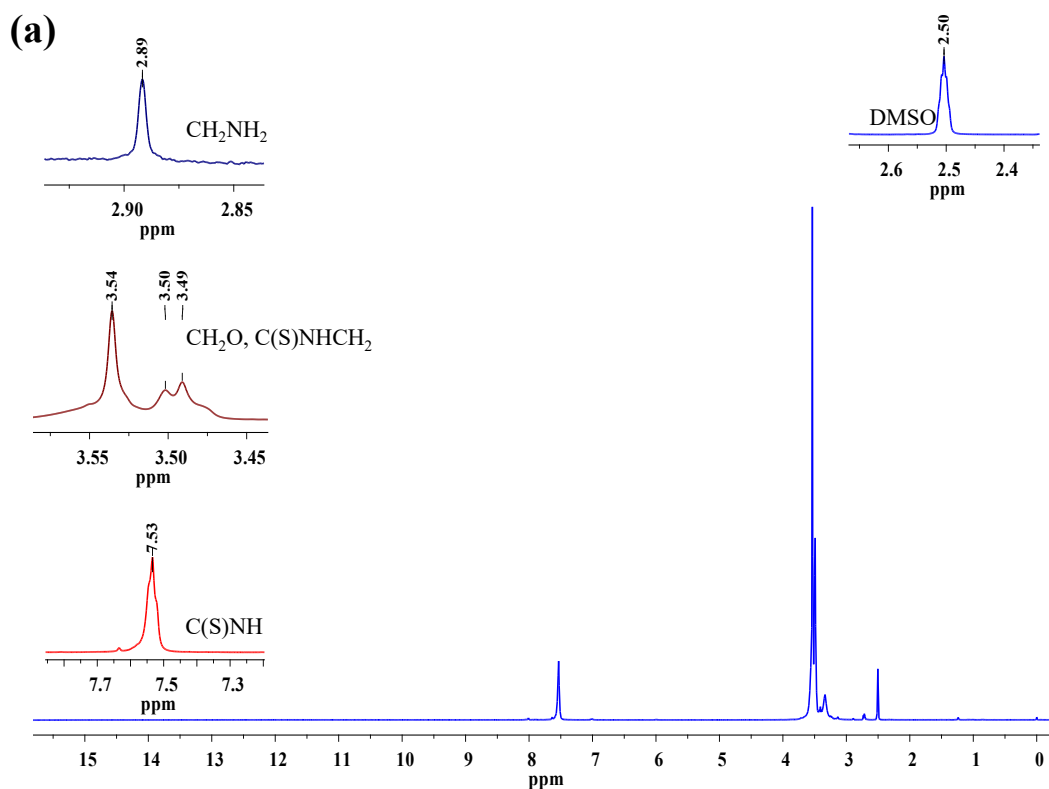

49

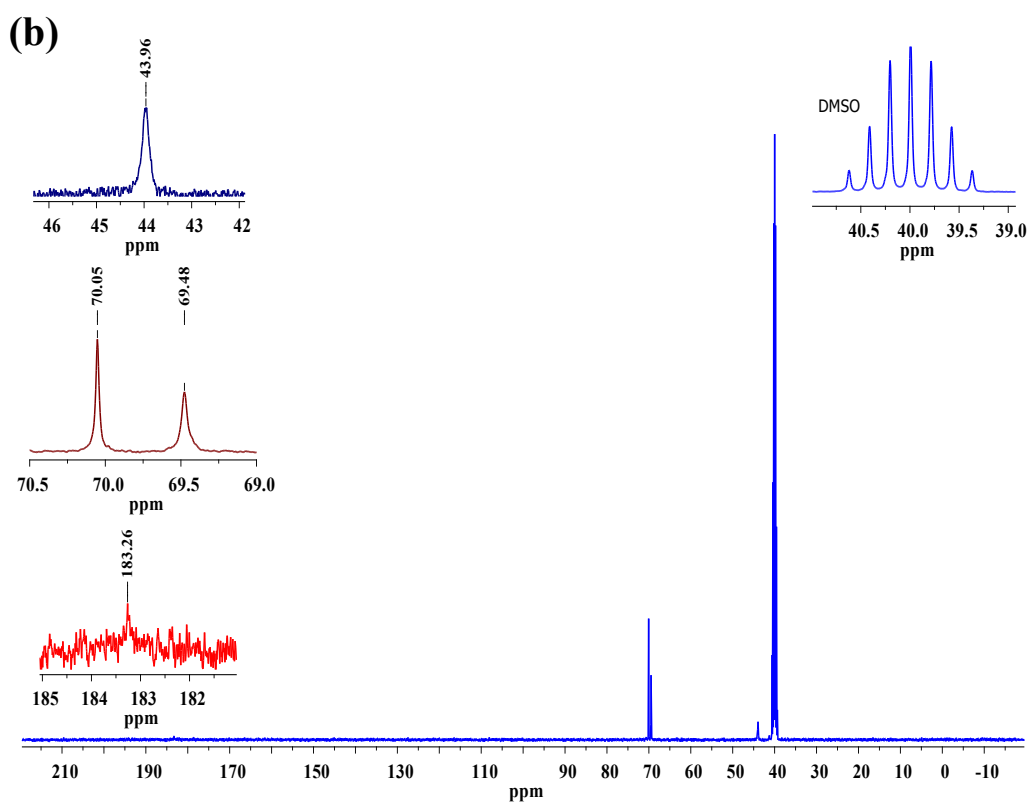

50

51 Fig. S2 (a) <sup>1</sup>H and <sup>13</sup>C (b) NMR spectra for PTUEG<sub>3</sub> (DMSO-d<sub>6</sub>, 298K). The signals at δ 2.50  
52 (<sup>1</sup>H) and 39.5–40.5 ppm (<sup>13</sup>C) are partially non-deuterated residues of DMSO-d<sub>6</sub> and water.

53

## 54 Supporting table

55 Table S1: Comparative study of self-healing rubber materials

| Rubber material             | Healing time (hrs) | Stimulation | Tensile strength (MPa) | Elongation at break (%) | References       |
|-----------------------------|--------------------|-------------|------------------------|-------------------------|------------------|
| ENR-CNCs                    | 24                 | RT          | 1.19                   | 500                     | 2                |
| WNRPs-PSR                   | 24                 | 100 °C      | 1.15                   | 220                     | 3                |
| ENR-CMCS-PDA-B <sup>-</sup> | 24                 | 60°C        | 1.64                   | 777                     | 4                |
| SBR-BDB                     | 24                 | 80°C        | 2.68                   | 200                     | 5                |
| ENR-t-CNs                   | 24                 | RT          | 4.04                   | 198                     | 6                |
| PBR-CuCl <sub>2</sub>       | 12                 | 110 °C      | 4.0                    | 530                     | 7                |
| SPB                         | 12                 | RT          | 1.78                   | 322                     | 8                |
| NR-MA-DGEBA                 | 8                  | 120 °C      | 1.2                    | 250                     | 9                |
| SBR- C <sub>2,5</sub> -GTR1 | 7                  | 70°C        | 2.51                   | 617                     | 10               |
| SBR-MWCNT-FA                | 5                  | 100 °C      | 3.5                    | 480                     | 11               |
| NR-g-MA                     | 4                  | 130 °C      | 1.47                   | 325                     | 12               |
| ENR-CABt                    | 3                  | 150 °C      | 4.5                    | 400                     | 13               |
| NR-ENR-PTUEG <sub>3</sub>   | 12                 | RT          | 4.83                   | 833                     | <b>This work</b> |

56

## 57 Notes and references

- 58 1. Y. Yanagisawa, Y. Nan, K. Okuro and T. Aida, *Science*, 2018, **359**, 72-76.
- 59 2. J. Nie, W. Mou, J. Ding and Y. Chen, *Composites Part B: Engineering*, 2019, **172**, 152-  
60 160.
- 61 3. J. Ye, S. Tan, H. Deng, W. Huang, H. Jin, L. Zhang, H. Xiang and M. Zhang, *Green*  
62 *Chemistry*, 2023, **25**, 6327-6335.
- 63 4. J. Zhang, L. Cao and Y. Chen, *European Polymer Journal*, 2022, **168**, 111103.
- 64 5. Y. Chen, Z. Tang, X. Zhang, Y. Liu, S. Wu and B. Guo, *ACS applied materials &*  
65 *interfaces*, 2018, **10**, 24224-24231.
- 66 6. L. Cao, D. Yuan, C. Xu and Y. Chen, *Nanoscale*, 2017, **9**, 15696-15706.
- 67 7. H. Xiang, H. Qian, Z. Lu, M. Rong and M. Zhang, *Green Chemistry*, 2015, **17**, 4315-  
68 4325.
- 69 8. D. Wang, J. Guo, H. Zhang, B. Cheng, H. Shen, N. Zhao and J. Xu, *Journal of Materials*  
70 *Chemistry A*, 2015, **3**, 12864-12872.

- 71 9. M. Pire, S. Norvez, I. Iliopoulos, B. Le Rossignol and L. Leibler, *Polymer*, 2011, **52**,  
72 5243-5249.
- 73 10. M. H. Santana, M. Huete, P. Lameda, J. Araujo, R. Verdejo and M. A. López-Manchado,  
74 *European Polymer Journal*, 2018, **106**, 273-283.
- 75 11. X. Kuang, G. Liu, X. Dong and D. Wang, *Macromolecular Materials and Engineering*,  
76 2016, **301**, 535-541.
- 77 12. P. Tanasi, M. H. Santana, J. Carretero-González, R. Verdejo and M. A. López-Manchado,  
78 *Polymer*, 2019, **175**, 15-24.
- 79 13. C. Xu, R. Cui, L. Fu and B. Lin, *Composites Science and Technology*, 2018, **167**, 421-  
80 430.
